# Supplementary material for: Koumine’s Therapeutic Impact on Hepatocellular Carcinoma: A Combined Network Pharmacology and Experimental Study
Source: MDPI journal article supplement (doi:10.3390/biomedicines14061250), 2026-05-30
Supplement: s1 [file Supplementary Materials Figure S1.pdf › Supplementary Materials Figure S1.pdf]

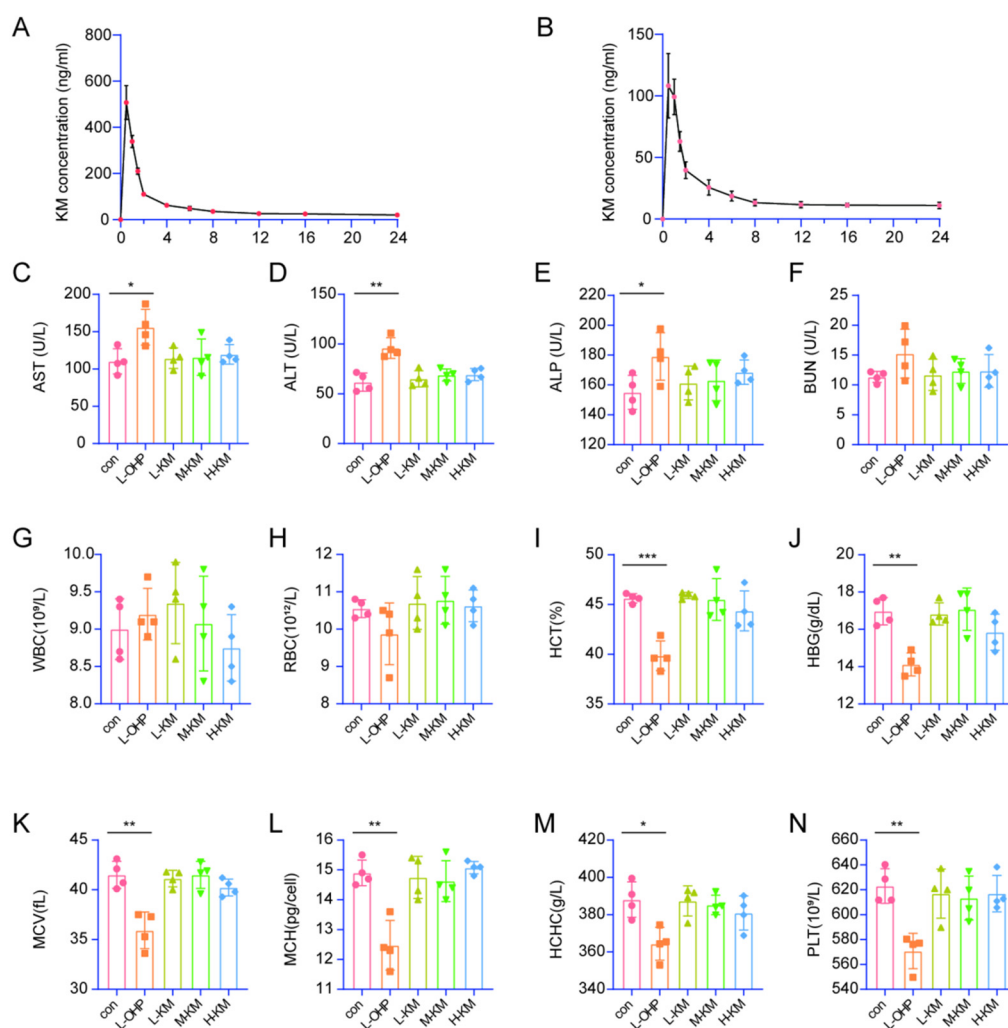

**Figure S1. Pharmacokinetic profiles of KM in mice and its effects on liver/kidney function and hematological parameters.**

(A, B) Mean plasma concentration–time curves of KM after intraperitoneal injection at 8 mg/kg (A) or 1 mg/kg (B) in C57 mice. KM showed rapid absorption, short retention, and large volume of distribution. (C–F) Effects of KM and L-OHP on serum AST, ALT, ALP, and BUN. L-OHP elevated AST, ALT, and ALP (indicating liver injury), but did not affect BUN. KM had no significant effect on these markers. (G–N) Effects of KM and L-OHP on hematological parameters (WBC, RBC, HCT, HBG, MCV, MCH, MCHC, PLT). L-OHP reduced RBC, HBG, and PLT (indicating hematotoxicity), while KM showed no significant impact, confirming good biological safety.
